# Supplementary material for: The relationship of femoral neck shaft angle and adiposity to greater trochanteric pain syndrome in women. A case control morphology and anthropometric study
Source: HighWire-hosted journal article supplement (doi:10.1136/bjsports-2011-090744), 2012-04-30
Supplement: bjsports-2011-090744_ds1.pdf [file bjsports-2011-090744_ds1.pdf]

**SUPPLEMENTARY DATA**

**Table S1: Intra and inter tester reliability**

**Results of Intra and Inter Tester Reliability for Width Measurements, by Tester.**

| Measurement of distance<br>from the mid line to... | Tester comparison          |                            |                                              |
|----------------------------------------------------|----------------------------|----------------------------|----------------------------------------------|
|                                                    | Tester one<br>ICC (95% CI) | Tester two<br>ICC (95% CI) | Tester one vs.<br>Tester two<br>ICC (95% CI) |
| AIIS                                               | 0.99<br>(0.99 to 0.99)     | 0.86<br>(0.77 to 0.95)     | 0.94<br>(0.90 to 0.98)                       |
| Lateral acetabulum                                 | 1.0<br>(1.0 to 1.0)        | 0.99<br>(0.99 to 0.99)     | 0.99<br>(0.98 to 1.0)                        |
| Superior GT                                        | 1.0<br>(1.0 to 1.0)        | 0.97<br>(0.95 to 0.99)     | 0.98<br>(0.97 to 0.99)                       |
| Lateral GT                                         | 1.0<br>(1.0 to 1.0)        | 0.99<br>(0.98 to 1.0)      | 0.98<br>(0.98 to 0.98)                       |

Note. The measurement of the distance from the midline to the AIIS = Distance A; the measurement of the midline to the lateral acetabulum = Distance B; The distance from the midline to the superior GT = Distance C; the distance from the midline to the lateral GT = D.

**Table S2: Intra and Inter Tester Reliability of Angle Measurements by Tester**

| Measure            | Tester one<br>ICC (95%CI) | Tester two<br>ICC (95% CI) | Tester one vs.<br>Tester two, ICC<br>(95% CI) |
|--------------------|---------------------------|----------------------------|-----------------------------------------------|
| Acetabular index ° | 0.99<br>(0.96 to 1.00)    | 0.72<br>(0.62 to 0.80)     | 0.77<br>(0.72 to 0.82)                        |
| Neck-shaft angle ° | 0.82<br>(0.77 to 0.87)    | 0.77<br>(0.71 to 0.83)     | 0.86<br>(0.81 to 0.91)                        |

## CANONICAL DISCRIMINANT ANALYSIS

**Table S3: Tests of Discriminant Dimensions**

|             | Canonical correlation | F Values | P values |
|-------------|-----------------------|----------|----------|
| Dimension 1 | 0.55                  | 1.47     | 0.048*   |
| Dimension 2 | 0.43                  | 0.99     | 0.485    |
| Dimension 3 | 0.24                  | 0.28     | 0.872    |

Note. \*Dimension 1 was found to differentiate between the four groups

**Table S4: Group means on canonical dimensions**

|      | Dimension 1<br>Peripheral adiposity and width of<br>the lateral greater trochanter |
|------|------------------------------------------------------------------------------------|
| ASC  | -0.68                                                                              |
| OA   | -0.66                                                                              |
| GTPS | 0.82                                                                               |
| GTR  | 0.18                                                                               |

Note. ASC: Asymptomatic control group; OA: Hip osteo-arthritis group; GTPS: Greater trochanteric pain syndrome group; GTR: Gluteal tendon reconstruction group. The GTPS and GTR group have positive means for dimension 1, with the GTPS group having the highest mean. The ASC and OA groups have negative means for dimension 1. This suggests that peripheral adiposity and width at the superior aspect of the greater trochanter are associated with greater trochanteric pain syndrome.
